# Supplementary material
Source: Elsevier journal article supplement (https://www.sciencedirect.com/science/article/pii/S0213911121000789)
Supplement: mmc1 [file S0213911121000789:mmc1.doc]

**Appendix A**

**Table I**

Assessment based on criteria review: in each area of interest, several items are assessed in the school and, according to the percentage of fulfilment accomplished, the school’s practice grade in this area is determined

| **Poor practice** | **Fair practice** | **Good practice** | **Best practice** |
| --- | --- | --- | --- |
| ≤ 25%  No/very few criteria are met, can be seen or documented. | 26% ≤ 50%  Some criteria are met, can be seen or documented. | 51% ≤ 75%  Many criteria are met, can be seen or documented. | 76% ≤ 100%  Most criteria are met; some may exceed current best practice. |

**Table II**

List of potential informants that could be interviewed during a school evaluation

| **Informant category** | **Informants** |
| --- | --- |
| School administrator | Principal; assistant principal |
| Teacher | Grade/classroom; physical education; health |
| District food service director | District-level director of food services (or equivalent) |
| Cafeteria staff | School meal program manager; cafeteria staff |
| Classified/volunteer staff, specifically: | Teacher aides; instructional assistants; extension educators; garden coordinator; before/after school program coordinator |
| Wellness | Wellness committee chairperson or members; school nurse; counsellor |
| Other, specifically: | Parents; school bus driver; maintenance staff |
