# Supplementary material
Source: Elsevier journal article supplement (https://www.sciencedirect.com/science/article/pii/S0213911121000789)
Supplement: mmc2 [file S0213911121000789:mmc2.doc]

**Appendix B**

**Documentation consulted for the SPAN-ET adaptation to the Spanish context**

- Alonso López F, coordinador. Accesibilidad en los espacios públicos urbanizados. Ministerio de la Vivienda, 11 de marzo de 2010. NIPO: 751-10-026-3. Available at: <https://www.fomento.gob.es/NR/rdonlyres/EC23F871-B5EB-4482-8E3D-10B40D251397/116390/ACCESEspaPublicUrba.pdf>
- Anonymous. Criterios para organizar y distribuir el tiempo escolar, así como los objetivos y programas en el tiempo extraescolar. Junta de Andalucía. (A.) Available at: <http://www.juntadeandalucia.es/averroes/centros-tic/04003470/helvia/sitio/upload/TIEMPO_ESCOLAR.PEC..pdf>
- Anonymous. Criteris per a la construcció de nous edificis per a centres docents públics. Generalitat de Catalunya, Departament d’Ensenyament, versió revisada 2016. (Accessed 30/12/2020.) Available at: <http://educacio.gencat.cat/web/.content/home/departament/publicacions/monografies/criteris-construccio-edificis-centres-publics/criteris_construccio_edificis_centres_docents_publics.pdf>
- Anonymous. Curriculum educació primaria. Generalitat de Catalunya, Departament d’Ensenyament, gener 2017. (Accessed 30/12/2020.) Available at: <http://educacio.gencat.cat/ca/departament/publicacions/colleccions/curriculum/curriculum-ed-primaria/>
- Aranceta Bartrina J, Arija Val V, Maíz Aldalur E, et al. Guías alimentarias para la población española (SENC, diciembre 2016); la nueva pirámide de la alimentación saludable. Nutr Hosp. 2016;33(Supl 8):1-48.
- Arnaiz Sancho V, Basterrechea Meunier I, Salvador Carreño S. Guía para proyectar y construir escuelas infantiles. Federación Española de Municipios y Provincias / Ministerio de Educación, Secretaría de Estado de Educación y Formación Profesional, 2011. NIPO: 820-11-486-3. Available at: <http://femp.femp.es/files/566-1151-archivo/Gu%C3%ADa%20para%20proyectar%20y%20construir%20escuelas%20infantiles.pdf>
- Aznar Laín S, Webster T. Actividad física y salud en la infancia y la adolescencia: guía para todas las personas que participan en su educación. Capítulo 5: La actividad física en el entorno escolar y en la comunidad. Ministerio de Sanidad y Consumo / Ministerio de Educación y Ciencia. NIPO: 351-06-042-1. (Accessed 30/12/2020.) Available at: <https://www.mscbs.gob.es/ciudadanos/proteccionSalud/adultos/actiFisica/docs/ActividadFisicaSaludEspanol.pdf>
- Ballesteros Arribas JM, Villar Villalba C, coordinadores. Documento de consenso sobre la alimentación en los centros educativos. Ministerio de Educación y Ministerio de Sanidad y Consumo, 21 de julio de 2010. NIPO: 863-10-004-7. (Accessed 15/02/2010.) Available at: <https://www.aesan.gob.es/AECOSAN/docs/documentos/nutricion/educanaos/documento_consenso.pdf>
- Camino escolar seguro. Ministerio del Interior, Dirección General de Tráfico. (Accessed 30/12/2020.) Available at: <https://www.caminoescolarseguro.com/>
- Comisión Europea / EACEA / Eurydice. La educación física y el deporte en los centros escolares de Europa. Informe de Eurydice. Luxemburgo: Oficina de Publicaciones de la Unión Europea, 2013. (Accessed 30/12/2020.) Available at: <http://eacea.ec.europa.eu/education/eurydice>
- Criterios para la autorización de campañas de promoción alimentaria, educación nutricional o promoción del deporte o actividad física en escuelas infantiles y centros escolares, cuyo objetivo sea promover una alimentación saludable, fomentar la actividad física y prevenir la obesidad. Ministerio de Sanidad, Servicios Sociales e Igualdad, Agencia Española de Consumo, Seguridad Alimentaria y Nutrición, 2015. NIPO: 690-15-004-9. (Accessed 30/12/2020.) Available at: <http://www.aesan.gob.es/AECOSAN/docs/documentos/nutricion/educanaos/criterios_autorizacion.pdf>
- Criterios para organizar y distribuir el tiempo escolar, así como los objetivos y programas en el tiempo extraescolar. Junta de Anadalucía, Consejería de Educación. (Accessed 30/12/2020.) Available at: <http://www.juntadeandalucia.es/averroes/centros-tic/29006143/helvia/sitio/upload/Criterios_para_organizar_y_distribuir_el_tiempo_escolar_y_extraescolar.pdf>
- Dapcich V, Salvador Castell G, Ribas Barba L, et al. Guía de la alimentación saludable. Sociedad Española de Nutrición Comunitaria, 2010. (Accessed 30/12/2020.) Available at: <http://www.nutricioncomunitaria.org/es/noticia-documento/19>
- Documents per a l’organització i la gestió dels centres: Prevenció de riscos laborals. Generalitat de Catalunya, Departament d’Ensenyament, 21/07/2020. (Accessed 30/12/2020.) Available at: <https://documents.espai.educacio.gencat.cat/IPCNormativa/DOIGC/GEST_Prevencio_riscos.pdf>
- Documents per a l'organització i la gestió dels centres: Seguretat i salut. Generalitat de Catalunya, Departament d’Ensenyament, 30/05/2016. (Accessed 30/12/2020.) Available at: <http://acise.cat/wp-content/uploads/2016/05/GEST_Seguretat_salut.pdf>
- Fernández-Franco J. Los centros docentes y sus nuevos requisitos mínimos. Escuela Abierta. 2010;13:9-35.
- Horaris dels centres. Generalitat de Catalunya, Departament d’Ensenyament, 15-04-2016. (Accessed 30/12/2020.) Available at: <http://educacio.gencat.cat/ca/arees-actuacio/centres-serveis-educatius/centres/horari-centres/>
- Instituto para la Diversificación y Ahorro de Energía / Comité Español de Iluminación. Guía técnica de eficiencia energética en iluminación. Centros docentes. Ministerio de Ciencia y Tecnología, marzo de 2001. (Accessed 30/12/2020.) Available at: <https://www.idae.es/uploads/documentos/documentos_5573_GT_iluminacion_centros_docentes_01_6803da23.pdf>
- Instrucción 13/TV-77: Guía para la redacción de informes técnicos sobre la idoneidad de la localización de paradas de transporte escolar. Approval date: 15-07-2013. Ministerio del Interior, Dirección General de Tráfico. (Accessed 30/12/2020.) Available at: <http://aspex.juntaex.es/filescms/aspex/uploaded_files/pdf/leg/dgt_instruccion_13-tv-77_guia_informes_paradas_transporte_escolar_13-07-2013.pdf>
- Instrucciones de 24 de mayo de 2005 de la Subsecretaría de Educación y Ciencia, que regulan la organización y funcionamiento de los centros docentes de titularidad del estado español en el exterior. Approval date: 24-05-2005. (Accessed 30/12/2020.) Available at: <https://transparencia.gob.es/servicios-buscador/contenido/normativainstruccion.htm?id=NORMAT_E0492930117838&lang=ca&fcAct=2017-03-10T13:25:26.046Z>
- La ventilación en los centros escolares. ERGA Primaria Transversal no. 42, 2014. Ministerio de Trabajo y Seguridad Social, Instituto Nacional de Seguridad e Higiene en el Trabajo. (Accessed 30/12/2020.) Available at: <https://www.insst.es/documents/94886/156731/N%C2%BA+42+La+ventilaci%C3%B3n+en+los+centros+escolares>
- Laria del Vas J, Monclús González J, Ortega Pérez J, et al. Manual de inspecciones de seguridad vial en entornos escolares (MAPFRE). Fundación MAPFRE, septiembre 2014. (Accessed 30/12/2020.) Available at: <https://www.fundacionmapfre.org/publicaciones/todas/manual-inspecciones-seguridad-vial-entornos-escolares/>
- Lecumberri C, Sarramona J. Competències bàsiques de l’àmbit de l’educació física. Generalitat de Catalunya, Departament d’Ensenyament, desembre 2016. (Accessed 30/12/2020.) Available at: <http://educacio.gencat.cat/ca/departament/publicacions/colleccions/competencies-basiques/primaria/ambit-educacio-fisica/>
- Ley 17/2011, de 5 de julio, de seguridad alimentaria y nutrición. (Accessed 30/12/2020.) Available at: <https://www.boe.es/eli/es/l/2011/07/05/17/con>
- Ley Orgánica 2/2006, de 3 de mayo, de Educación. (Accessed 30/12/2020.) Available at: <https://www.boe.es/eli/es/lo/2006/05/03/2/con>
- Ley Orgánica 3/2018, de 5 de diciembre, de protección de datos personales y garantía de los derechos digitales. (Accessed 30/12/2020.) Available at: <https://www.boe.es/eli/es/lo/2018/12/05/3/con>
- McLennan N, Thompson J. Educación física de calidad (EFC): guía para los responsables políticos. UNESCO, Sector de Ciencias Sociales y Humanas, 2015. (Accessed 30/12/2020.) Available at: <https://unesdoc.unesco.org/ark:/48223/pf0000231340>
- Navas Hernández RE, Roman M. Camino escolar: paso a paso. Ministerio del Interior, Dirección General de Tráfico. NIPO: 128-13-005-8. (Accessed 30/12/2020.) Available at: <http://www.dgt.es/PEVI/contenidos/Externos/recursos/infancia/camino_escolar/camino_escolar_Paso_a_Paso.pdf>
- Normas y estándares para las construcciones escolares. UNESCO, División de Políticas y Planeamiento de la Educación, junio de 1986. (Accessed 30/12/2020.) Available at: <https://www.yumpu.com/es/document/read/18052698/normas-y-estandares-para-las-construcciones-unesdoc-unesco>
- Orden VIV/561/2010, de 1 de febrero, por la que se desarrolla el documento técnico de condiciones básicas de accesibilidad y no discriminación para el acceso y utilización de los espacios públicos urbanizados, ref. BOE-A-2010-4057. (Accessed 30/12/2020.) Available at: <https://www.boe.es/eli/es/o/2010/02/01/viv561>
- Orientacions per al desplegament del currículum: educación física a l’ESO. Generalitat de Catalunya, Departament d’Ensenyament, març de 2010. (Accessed 30/12/2020.) Available at: <http://xtec.gencat.cat/web/.content/alfresco/d/d/workspace/SpacesStore/0088/d699dbcd-952b-4ef0-943c-579fee09b56f/orientacions_educacio_fisica_eso.pdf> [
- Prevención de riesgos laborales [Código electrónico]. Edición actualizada a 27 de enero de 2021. (Accessed 27/2/2021.) Available at: <https://www.boe.es/biblioteca_juridica/codigos/codigo.php?id=037_Prevencion_de_riesgos_laborales&modo=2>
- Real Decreto 132/2010, de 12 de febrero, por el que se establecen los requisitos mínimos de los centros que impartan las enseñanzas del segundo ciclo de la educación infantil, la educación primaria y la educación secundaria. (Accessed 30/12/2020.) Available at: <https://www.boe.es/eli/es/rd/2010/02/12/132>
- Real Decreto 314/2006, de 17 de marzo, por el que se aprueba el Código Técnico de la Edificación. (Accessed 30/12/2020.) Available at: <https://www.boe.es/eli/es/rd/2006/03/17/314>
- Real Decreto 505/2007, de 20 de abril, por el que se aprueban las condiciones básicas de accesibilidad y no discriminación de las personas con discapacidad para el acceso y utilización de los espacios públicos urbanizados y edificaciones. (Accessed 30/12/2020.) Available at: <https://www.boe.es/eli/es/rd/2007/04/20/505>
- Resolución de 4 de agosto de 2015 de la Secretaría de Estado de Educación, Formación Profesional y Universidades, por la que se establecen los criterios y los procedimientos para la elaboración y aprobación de la oferta formativa de Educación Secundaria Obligatoria y de Bachillerato de los centros de titularidad del Estado español en el exterior, y se regulan determinados aspectos organizativos. Approval date: 04-08-2015. (Accessed 30/12/2020.) Available at: <https://transparencia.gob.es/servicios-buscador/contenido/normativaresolucion.htm?id=NORMAT_E0492510138165&fcAct=2017-11-16T12:31:05.065Z&lang=en>
- Roldan Vendrell C, coordinadora. Manual de seguridad en los centros educativos. Consejería de Educación y Ciencia, Dirección General de Construcciones y Equipamiento Escolar, 2002. (Accessed 30/12/2020.) Available at: <http://www.iseandalucia.es/c/document_library/get_file?uuid=374fefab-8f38-4d19-950b-c6f71343dd43&groupId=10137>
