# Supplementary material
Source: Elsevier journal article supplement (https://www.sciencedirect.com/science/article/pii/S0213911121000789)
Supplement: mmc4 [file S0213911121000789:mmc4.doc]

**Appendix D**

**Ejemplo del formulario SPAN-ET-ES**

En el presente anexo se muestran ejemplos para las categorías de actividad física y nutrición en los diferentes entornos evaluados: entorno físico, situacional y de políticas.

| **Actividad física** | | | | | | |
| --- | --- | --- | --- | --- | --- | --- |
| **Categoría: Entorno físico** | | | | | | |
| **Área de interés 8: Características del barrio** | | | | | | |
| **Fuentes de datos:**  ⌧ Observación directa  Hora AM / PM  ⌧ Entrevista  □ Revisión de documentos:  □ Otros, por favor especifique: | | | | | **Informantes:**  □Administrador de la escuela  □Docente, especifique:  □Encargado del comedor escolar/personal de cafetería  □Personal no docente/voluntarios,  especifique:  □Comisión de bienestar  □ Otros, especifique: | |
| **Descripción:**  Las características del entorno construido y del vecindario más cercano a la zona escolar se prestan a la actividad física segura / acceso de transporte activo para la circulación de peatones y bicicletas desde el barrio hasta los puntos de acceso al edificio. | | | | | | |
|  | |  |  | | | |
| **Criterios** | | Las características de barrio incluyen lo siguiente: | | | | |
|  | □ **A** | Carreteras seguras con aceras, carriles para bicicletas y pasos de peatones claramente marcados. | | | | |
|  | □ **B** | Existen características que atenúan el tráfico, tales como señalización de la zona escolar, luces de precaución, resaltos de velocidad, chicanes o barreras, conos según ordenanzas locales y estatales. | | | | |
|  | □ **C** | Señalización que contribuye a un transporte escolar seguro y activo. | | | | |
|  | □ **D** | Existen anclajes para aparcar bicicletas. | | | | |
|  | □ **E** | Presencia de senderos a parques infantiles e instalaciones deportivas que evitan el tráfico de vehículos. | | | | |
|  |  |  | | | | |
|  |  |  | | | | |
|  |  |  | | | | |
|  |  |  | | | | |
|  |  |  | | | | |
|  |  |  | | | | |
|  |  |  | | | | |
| □ Práctica pobre | | | | □ Práctica aceptable | □ Práctica buena | □ Práctica excelente |
| # Criterios cumplidos ___ / 5 total criterios = ____ % | | | | | | |
| **Notas:** | | | | | | |

| **Actividad física** | | | | | | |
| --- | --- | --- | --- | --- | --- | --- |
| **Categoría: Entorno situacional** | | | | | | |
| **Área de interés 11: Oportunidades para moverse** | | | | | | |
| **Fuentes de datos:**  ⌧ Observación directa  Hora AM / PM  ⌧ Entrevista  □ Revisión de documentos:  □ Otros, por favor especifique: | | | | | **Informantes:**  □Administrador de la escuela  □Docente, especifique:  □Encargado del comedor escolar/personal de cafetería  □Personal no docente/voluntarios,  especifique:  □Comisión de bienestar  □ Otros, especifique | |
| **Descripción:**  Los equipamientos fijos y portátiles interiores y exteriores promueven la actividad física, el juego activo y una diversidad de movimientos importantes para el desarrollo. | | | | | | |
|  | |  |  | | | |
| **Criterios** | |  | | | | |
|  | □ **A** | Las características y el equipamiento clave presentes en el espacio al aire libre permiten y promueven una variedad de movimientos físicamente activos, tales como saltar, escalar, en cuclillas, esquivar, lanzar, chutar, rebotar. | | | | |
|  | □ **B** | Las características y el equipamiento clave presentes en el espacio interior permiten y promueven una variedad de movimientos físicamente activos, tales como saltar, trepar, agacharse, balancearse, esquivar, lanzar, patear, rebotar. | | | | |
|  | □ **C** | El espacio interior es adecuado y está disponible cuando las condiciones exteriores son inadecuadas o inseguras. | | | | |
|  | □ **D** | Si la sala deportiva interior se utiliza para otros fines (por ejemplo, comidas escolares, asambleas), la actividad física (estructurada y no estructurada) está programada para maximizar el uso de la instalación. | | | | |
|  | □ **E** | Los maestros de la clase incluyen pausas de 3-5 minutos para moverse y activarse de manera divertida y creativa durante la clase. | | | | |
|  | □ **F** | La actividad física no se utiliza como castigo ni para retener por el mal comportamiento de los estudiantes. | | | | |
|  |  |  | | | | |
|  |  |  | | | | |
|  |  |  | | | | |
|  |  |  | | | | |
|  |  |  | | | | |
|  |  |  | | | | |
| □ Práctica pobre | | | | □ Práctica aceptable | □ Práctica buena | □ Práctica excelente |
| # Criterios cumplidos / 6 total criterios = ____ % | | | | | | |
| **Notas:** | | | | | | |

| **Actividad física** | | | | | | |
| --- | --- | --- | --- | --- | --- | --- |
| **Categoría: Entorno de políticas** | | | | | | |
| **Área de interés 16: Educación física estructurada** | | | | | | |
| **Fuentes de datos:**  ⌧ Observación directa  Hora AM / PM  ⌧ Entrevista  □ Revisión de documentos:  □ Otros, por favor especifique: | | | | | **Informantes:**  □Administrador de la escuela  □Docente, especifique:  □Encargado del comedor escolar/personal de cafetería  □Personal no docente/voluntarios, especifique:  □Comisión de bienestar  □ Otros, especifique: | |
| **Descripción:**  La escuela tiene un programa estructurado de educación física/actividad física que es coordinado o instruido por educadores físicos capacitados/acreditados. | | | | | | |
|  | |  |  | | | |
| **Criterios** | |  | | | | |
|  | □ **A** | La escuela tiene un profesor de educación física capacitado/acreditado. | | | | |
|  | □ **B** | Los estudiantes participan en un mínimo de 120 minutos de educación física estructurada por semana. | | | | |
|  | □ **C** | La enseñanza de educación física se basa en un currículo escrito y secuencial de educación en actividad física que es consistente con los estándares estatales o nacionales para educación física. | | | | |
|  | □ **D** | Los requisitos de educación física no son intercambiables por otras actividades o clases. | | | | |
|  | □ **E** | Se evalúan las habilidades de dominio de la actividad física y los resultados aparecen en el informe de calificaciones. | | | | |
|  | □ **F** | La educación física promueve la recreación físicamente activa y el desarrollo de destrezas activas en el estilo de vida (por ejemplo, correr, ir en bicicleta, salir de excursión, esquiar). | | | | |
|  | □ **G** | La educación para la actividad física implementa y hace cumplir las prácticas de seguridad para la prevención de lesiones, accidentes, etc. | | | | |
|  | □ **H** | Los instructores participan activamente y supervisan la educación de la actividad física. | | | | |
|  | □ **I** | La educación física fomenta comportamientos sociales y un estilo de vida activo. | | | | |
|  | □ **J** | Se incluye en el currículum la formación en una correcta utilización de las herramientas digitales que fomente la actividad física y disminuya el impacto que tiene el uso exagerado de aparatos electrónicos (pantallas, videojuegos, etc.) sobre la actividad física de los alumnos. | | | | |
|  |  |  | | | | |
|  |  |  | | | | |
| □ Práctica pobre | | | | □ Práctica aceptable | □ Práctica buena | □ Práctica excelente |
| # Criterios cumplidos___ / 10 total criterios = ____ % | | | | | | |
| **Notas:** | | | | | | |

| **Nutrición** | | | | | | |
| --- | --- | --- | --- | --- | --- | --- |
| **Categoría: Entorno físico** | | | | | | |
| **Área de interés 17: Área de servicio de alimentación/cafetería** | | | | | | |
| **Fuentes de datos:**  ⌧ Observación directa  Hora AM / PM  ⌧ Entrevista  □ Revisión de documentos:  □ Otros, por favor especifique: | | | | | **Informantes:**  □Administrador de la escuela  □Docente, especifique:  □Encargado del comedor escolar/personal de Cafetería  □Personal no docente/voluntarios,  especifique:  □Comisión de bienestar  □ Otros, especifique: | |
| **Descripción:**  El comedor o el área alternativa de servicio de alimentación (por ejemplo, el aula de clase) ofrece un ambiente limpio, agradable y seguro, con espacio adecuado para comer. | | | | | | |
|  | |  |  | | | |
| **Criterios** | |  | | | | |
|  | □ **A** | Existe espacio suficiente para la compra / servicio de comidas, con el espacio necesario para sentarse. | | | | |
|  | □ **B** | Mesas y sillas de tamaño adecuado para los estudiantes, con espacio para satisfacer necesidades especiales. El equipamiento y el mobiliario del servicio de alimentación están en buenas condiciones. | | | | |
|  | □ **C** | El medio ambiente minimiza las distracciones que dificulten la elección y el consumo de alimentos saludables a través de medidas tales como iluminación adecuada, reducción de ruido y disposición de los asientos. | | | | |
|  | □ **D** | Se dispone de lavamanos con jabón líquido o desinfectante de manos. Estos son accesibles y están ubicados en áreas convenientes cerca del comedor para fomentar la limpieza de las manos y las prácticas seguras de manipulación de los alimentos. | | | | |
|  | □ **E** | Las entradas están libres, secas y sin obstáculos, y facilitan un tráfico fluido de personas para reducir o eliminar los riesgos de seguridad y congestión. | | | | |
|  |  |  | | | | |
|  |  |  | | | | |
|  |  |  | | | | |
|  |  |  | | | | |
|  |  |  | | | | |
|  |  |  | | | | |
|  |  |  | | | | |
| □ Práctica pobre | | | | □ Práctica aceptable | □ Práctica buena | □ Práctica excelente |
| # Criterios cumplidos ___ / 5 total criterios = ____ % | | | | | | |
| **Notas:** | | | | | | |

| **Nutrición** | | | | | | |
| --- | --- | --- | --- | --- | --- | --- |
| **Categoría: Entorno situacional** | | | | | | |
| **Área de interés 23: Atmósfera del comedor escolar / cafetería** | | | | | | |
| **Fuentes de datos:**  ⌧ Observación directa  Hora AM / PM  ⌧ Entrevista  □ Revisión de documentos:  □ Otros, por favor especifique: | | | | | **Informantes:**  □Administrador de la escuela  □Docente, especifique:  □Encargado del comedor escolar/personal de cafetería  □Personal no docente/voluntarios,  especifique:  □Comisión de bienestar  □ Otros, especifique: | |
| **Descripción:**  Las comidas servidas a los estudiantes se presentan de manera atractiva en un ambiente agradable (amistoso, cómodo y acogedor), con tiempo suficiente para comer. | | | | | | |
|  | |  |  | | | |
| **Criterios** | |  | | | | |
|  | □ **A** | El personal es agradable y motiva a los estudiantes para practicar una alimentación sana y disfrutar de las comidas. | | | | |
|  | □ **B** | Se anima a los estudiantes a socializar entre sus compañeros y con adultos. | | | | |
|  | □ **C** | El espacio es limpio, libre de basura y bien utilizado. | | | | |
|  | □ **D** | Los estudiantes lavan o desinfectan sus manos en un lugar conveniente antes de comer. | | | | |
|  | □ **E** | El tiempo que los estudiantes pasan esperando en la línea de servicio de comida o bien a que su comida les sea servida es mínimo. | | | | |
|  | □ **F** | Se proporcionan al menos 15 minutos para el almuerzo (recreo) y al menos 30 minutos para comer (tiempo real). | | | | |
|  | □ **G** | Los alimentos se presentan de una manera tentadora y atractiva para los estudiantes. | | | | |
|  | □ **H** | Los elementos decorativos u objetos presentes en el comedor o cantina añaden interés visual o auditivo y son atractivos (decoración de mesa, arte mural, carteles, música, etc.). | | | | |
|  | □ **I** | El ruido ambiental se mantiene a un nivel apropiado aplicando las normas de manera aceptable y positiva (es decir, sin silbidos, sin órdenes de comer en silencio). | | | | |
|  | □ **J** | Los adultos supervisan adecuadamente el periodo de comida para cerciorarse del comportamiento seguro en el comedor y procuran mostrarse como modelos de alimentación saludable para los estudiantes. | | | | |
|  |  |  | | | | |
|  |  |  | | | | |
| □ Práctica pobre | | | | □ Práctica aceptable | □ Práctica buena | □ Práctica excelente |
| # Criterios cumplidos ___ / 10 total criterios = ____ % | | | | | | |
| **Notas:** | | | | | | |
